# Supplementary material
Source: HighWire-hosted journal article supplement (http://www.cmaj.ca/highwire/filestream/58295/field_highwire_adjunct_files/0/case-pierce-1-at.pdf)

**Appendix 1: Histologic section of a biopsy of the papules on the patient's face showing a follicular fibroma with branching follicular epithelium and a dense fibrous stroma (arrows) (hematoxylin and eosin stain, original magnification × 100).**

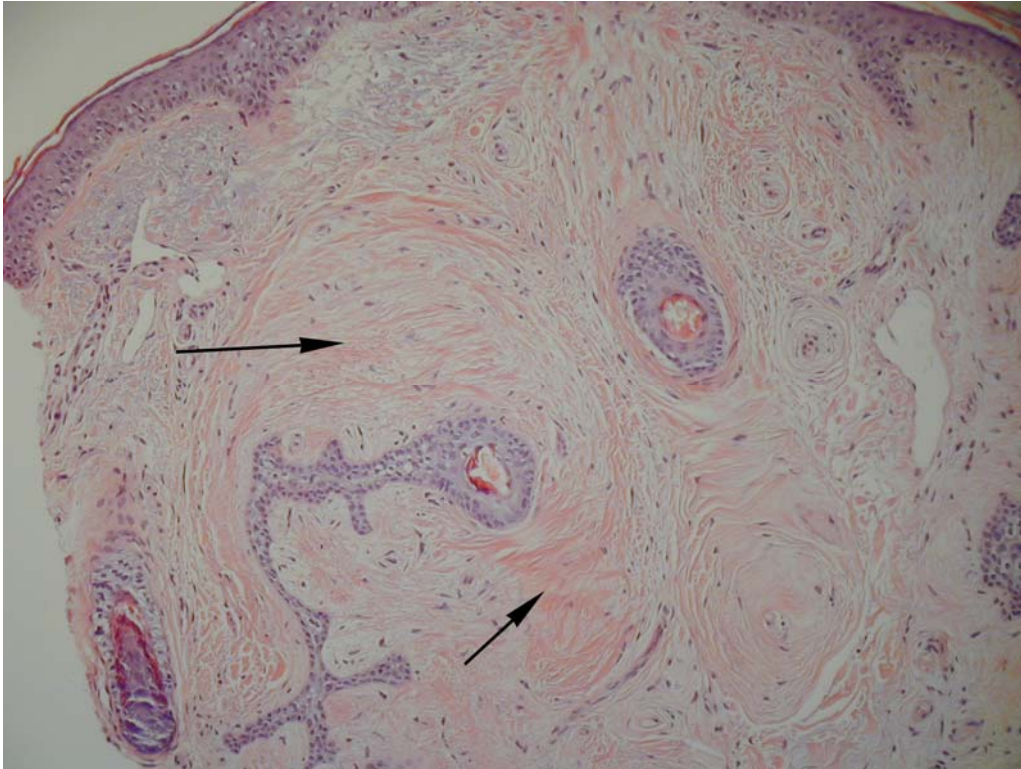

Supplement: case-pierce-1-at.pdf [file case-pierce-1-at.pdf]
